# Supplementary material
Source: PubMed Central journal article supplement (PMC3896996)
Supplement: NIHMS520829-supplement-Supporting_Information.pdf [file NIHMS520829-supplement-Supporting_Information.pdf]

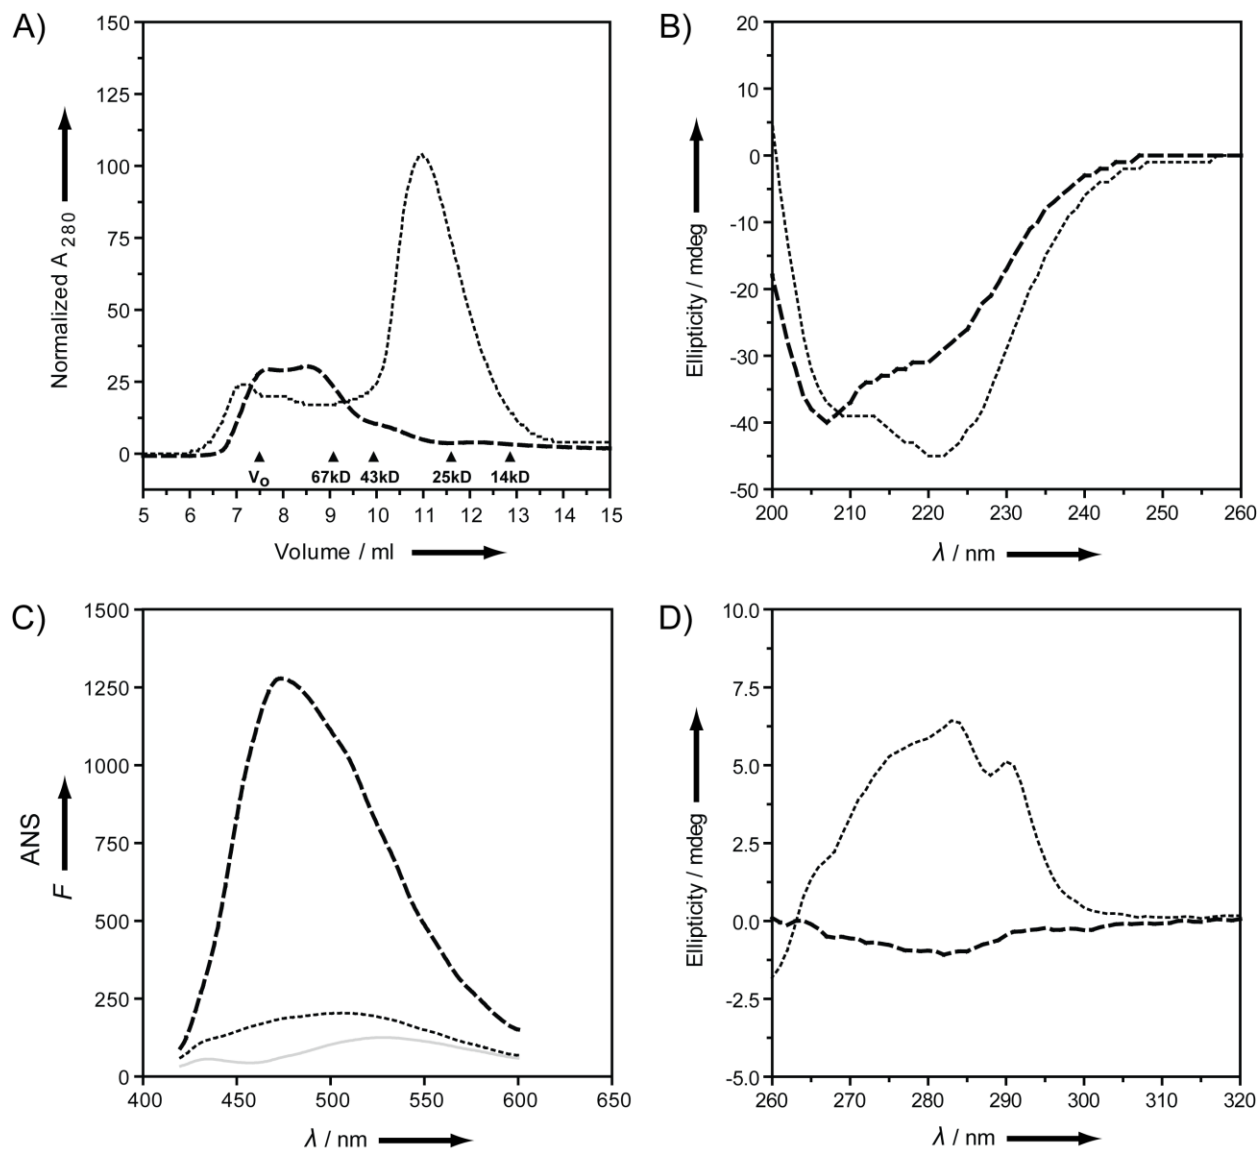

**Figure S1. Biophysical characterization of GDPDwt (black dotted line) and GDPDmut (black dashed line) proteins.** A) Investigation of quaternary structure by size exclusion chromatography. Monomeric GDPDwt elutes at 11 ml while oligomeric GDPDmut elutes at 8 ml. B) Far-UV circular dichroism spectroscopy to study the secondary structure. GDPDwt exhibits characteristic alpha-helical peaks at 208 nm and 222 nm while GDPDmut has lost some secondary structure, as indicated by signal decrease in 222 nm. C) 1-Anilinonaphthalene-8-sulfonic acid (ANS) fluorescence measurements (tertiary structure). ANS fluorescence is known to increase upon interaction with exposed hydrophobic protein patches, suggesting increased presence of exposed hydrophobic patches in GDPDmut, associated with the loss of the native GDPDwt tertiary structure. Buffer is shown as solid light gray line. D) Near-UV circular dichroism spectroscopy reveals that GDPDmut has significantly less tertiary structure relative to GDPDwt.

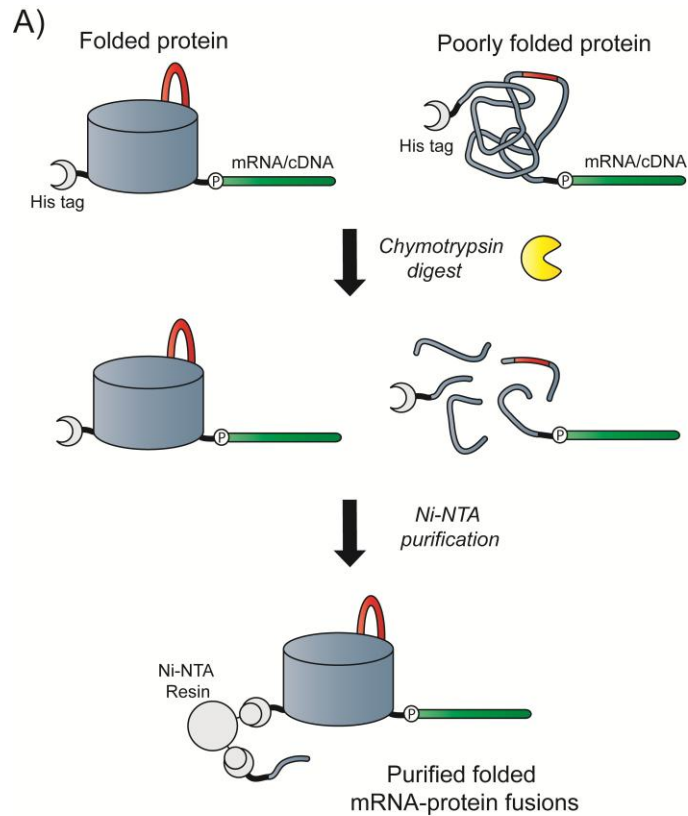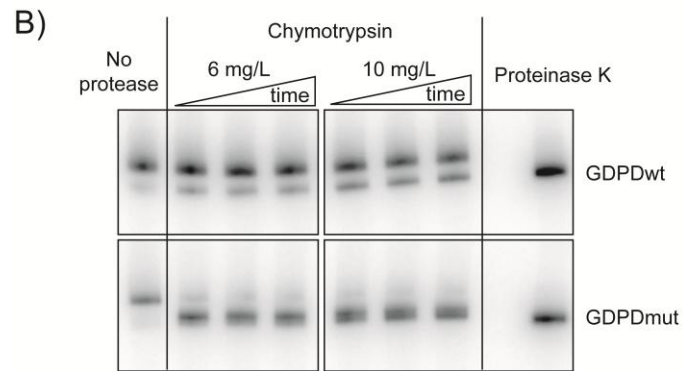

**Figure S2. Folding selection by *in vitro* protease digestion.** A) Schematic of the protease-digestion based selection by mRNA display. A mixture of folded and unfolded proteins that are covalently linked to their encoding mRNA/cDNA hybrid via puromycin (P) is subjected to chymotrypsin digest and then purified under denaturing conditions via Ni-NTA affinity chromatography. Only the cDNA of the well folded proteins is immobilized on the Ni-NTA resin, and amplified by PCR for downstream applications. In contrast, cleavage of unfolded proteins severs the link between His<sub>6</sub>-tag and cDNA, thereby preventing immobilization of the cDNA. B) Analysis of chymotrypsin digestion during initial optimization steps. mRNA-displayed GDPDwt and GDPDmut proteins were incubated with chymotrypsin for 10, 15 and 20 min prior to analysis of crude digest reactions by SDS-PAGE. Undigested mRNA-protein fusions and fusions treated with proteinase K (to degrade proteins non-specifically) were used as controls for 0% and 100% digestion, respectively. Under these conditions GDPDmut is preferentially digested by chymotrypsin. Final optimization steps included the additional use of detergents and an analysis of digestion based on comparison of His<sub>6</sub>-tag purified digested and undigested samples via scintillation counting.

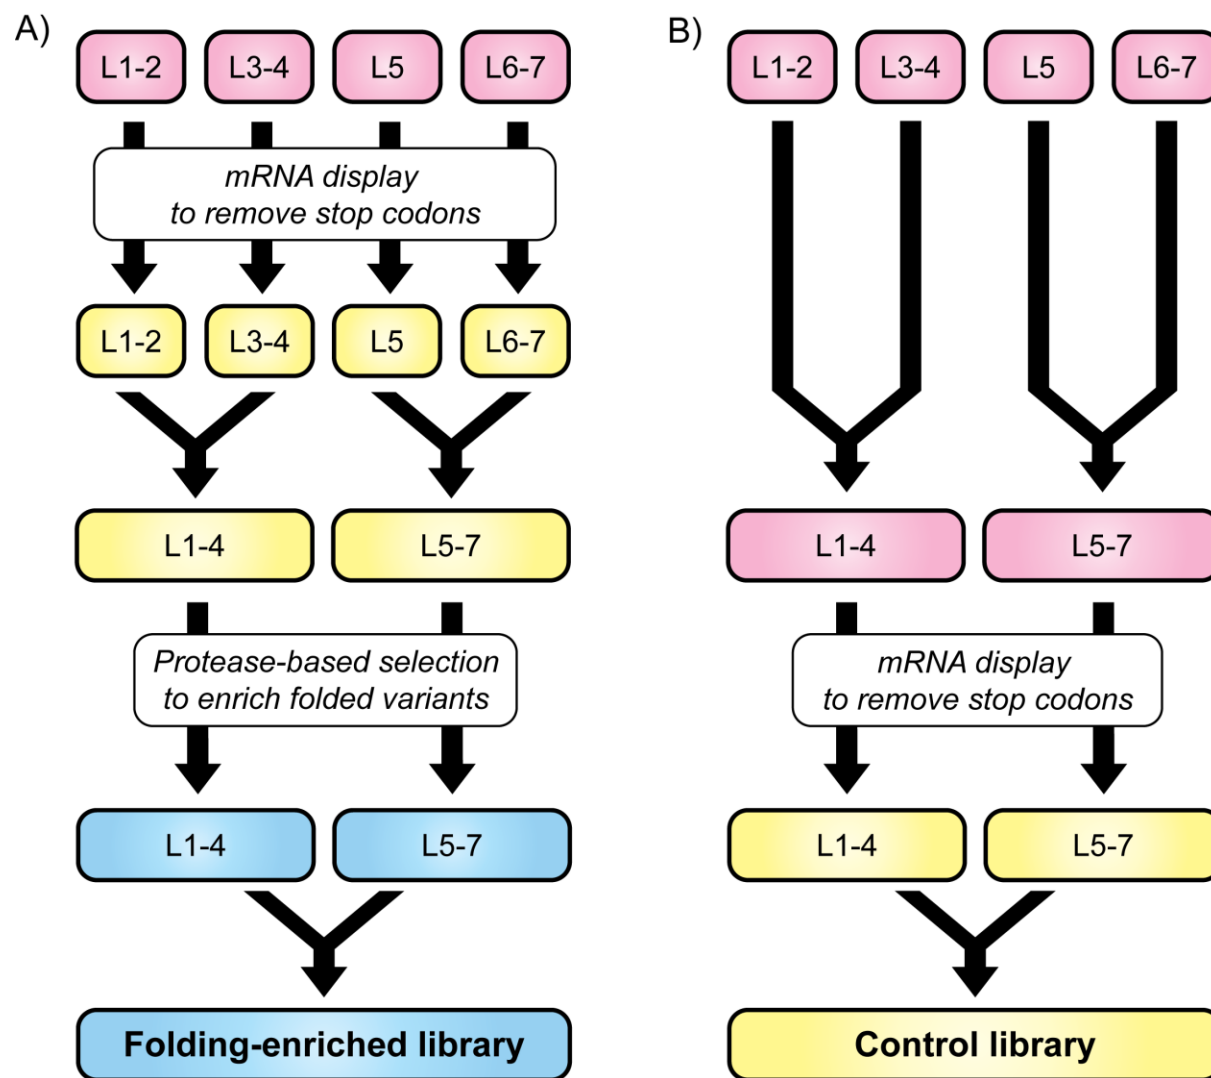

**Figure S3. Step-wise strategy for the construction of libraries based on the  $(\beta/\alpha)_8$  fold.** Each box represents an individual library with randomized loop(s) (e.g. library L1-2). Libraries containing only a single randomized loop are not shown for clarity. The libraries were mRNA-displayed to remove stop codons or, in addition, were subjected to a folding selection by *in vitro* protease digestion (shown in yellow and blue, respectively). A) Construction of the folding-enriched library. Full length  $(\beta/\alpha)_8$  barrel libraries were used in mRNA display and folding selection. B) Construction of the control library.  $(\beta/\alpha)_4$  half-gene fragments of the barrel libraries were used in mRNA display to prevent the native  $(\beta/\alpha)_8$  fold from biasing the randomized regions in the control library.

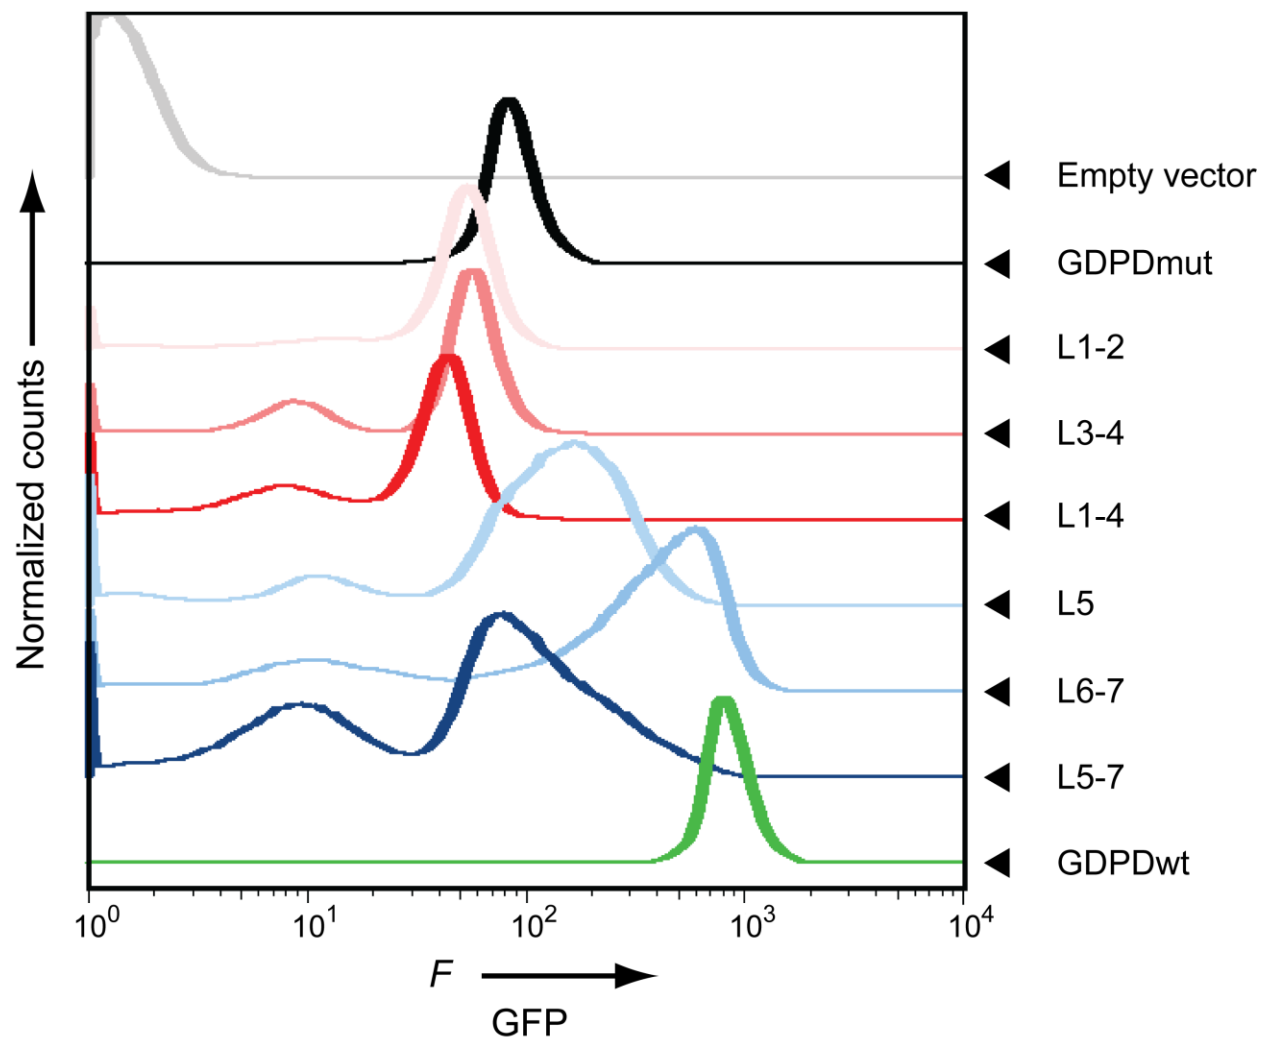

**Figure S4. Assessment of folding by GFP-fusion assay.** Fluorescence histograms of *E. coli* BL21(DE3) cells expressing the GFP-fused control constructs and intermediate libraries. The empty vector population was gated out on the histograms of cells transformed with the GDPD constructs. None of the libraries shown here had been selected yet for folding.

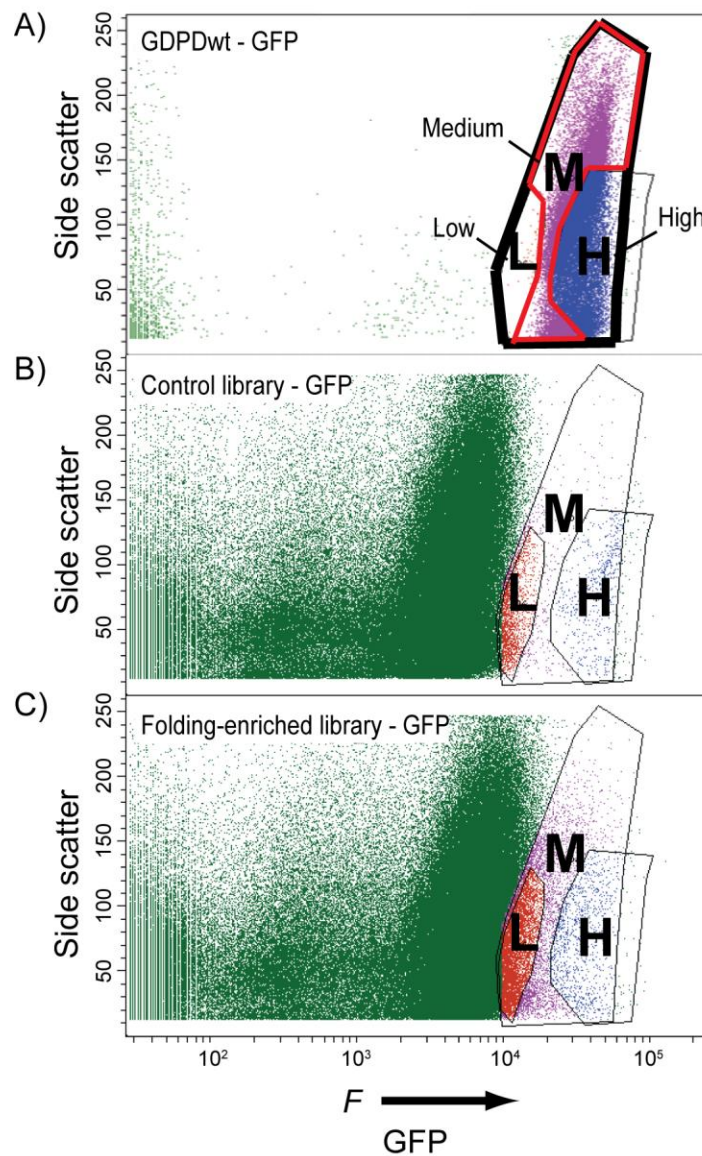

**Figure S5. Analysis of library populations by fluorescence-activated cell sorting experiments (FACS).** Side scatter versus GFP fluorescence dot plots are shown for A) GDPDwt-GFP, B) control library and C) folding-enriched library. In the top panel, the GDPDwt-like population of cells is framed with a thick black line. The low (L) and high (H) populations of library-GFP cells shown in the lower two panels were collected during the sorting experiment for further analysis. The number of cells in the medium (M) population was estimated (see Table S2).

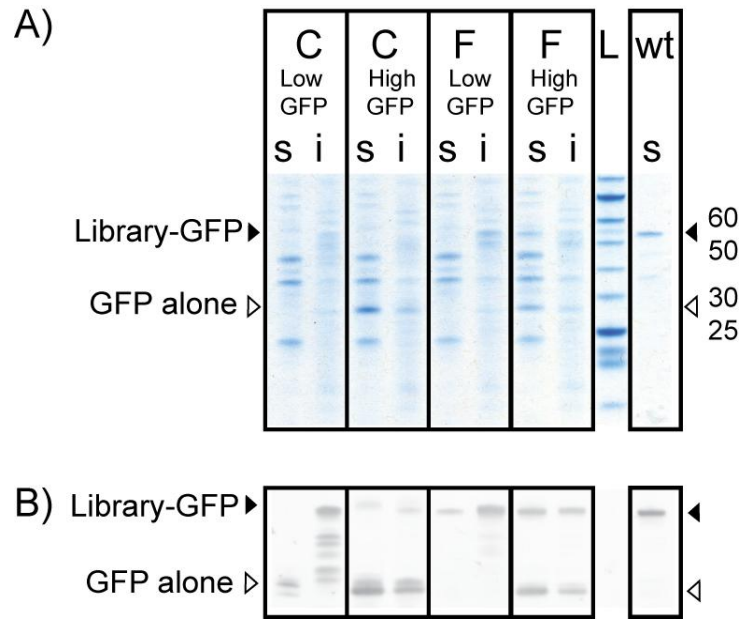

**Figure S6. Comparison of the soluble and insoluble fractions of the FACS sorted library populations.** A) SDS-PAGE gel Coomassie-stained. B) Western blot of SDS-PAGE gel using polyclonal anti-GFP antibody. Approximate molecular weights for library-GFP fusions (57 kD, black triangle) and for GFP alone (27 kD, white triangle). Equal amounts of soluble (s) and insoluble (i) fractions were loaded for each library. The soluble fraction of over-expressed GDPwt-GFP fusion is shown as positive control.

**Table S1.** GFP-fused *in vivo* folding assessment of intermediate libraries. <sup>[a]</sup>

| Species | Mode of GFP fluorescence <sup>[b]</sup> | % of cells with GDPDwt-GFP fluorescence <sup>[c]</sup> |
|---------|-----------------------------------------|--------------------------------------------------------|
| GDPDmut | 10.4                                    | 0.02                                                   |
| L1-2    | 6.7                                     | 0.90                                                   |
| L3-4    | 7.2                                     | 0.05                                                   |
| L1-4    | 5.4                                     | 0.09                                                   |
| L5      | 21.3                                    | 9.3                                                    |
| L6-7    | 72.3                                    | 51.6                                                   |
| L5-7    | 10                                      | 6.9                                                    |
| GDPDwt  | 100                                     | 98.5                                                   |

[a] Constructs were transformed into *E.coli* BL21(DE3) strain. Stop-codon containing libraries that have not been subjected to mRNA display. Prior to analysis all data were gated to exclude cell populations that matched fluorescence and scatter profiles of cells transformed with empty plasmid.

[b] Values normalized to the mode GFP fluorescence of GDPDwt-GFP.

[c] Wild type cells were gated on the forward scatter versus GFP contour plot to include ~98% of all wild type cells.

| <b>Table S2. Fraction of soluble library-GFP fusions in the FACS-sorted populations.</b> |                                  |                                |                      |                                |
|------------------------------------------------------------------------------------------|----------------------------------|--------------------------------|----------------------|--------------------------------|
| Library population <sup>[a], [b]</sup>                                                   | % Non-empty cells <sup>[c]</sup> | % soluble GFP fusions          |                      |                                |
|                                                                                          |                                  | of sorted cells                |                      | of all cells <sup>[e]</sup>    |
|                                                                                          |                                  | By Western blot <sup>[d]</sup> | By SDS-PAGE          |                                |
| Control, low GFP                                                                         | 0.86%                            | 0.24%                          | <5% (0/18 clones)    | 0.002%                         |
| Control, medium GFP                                                                      | 0.23% <sup>[f]</sup>             | 0.24% - 5.76% <sup>[g]</sup>   | not available        | 0.001% - 0.013%                |
| Control, high GFP                                                                        | 0.31%                            | 5.76%                          | <5% (0/19 clones)    | 0.018%                         |
| Estimated % soluble proteins in control library                                          |                                  |                                |                      | 0.020% - 0.033% <sup>[h]</sup> |
| Folding-enriched, low GFP                                                                | 3.18%                            | 18.20%                         | 29% (4/14 clones)    | 0.579%                         |
| Folding enriched, mid GFP                                                                | 1.68% <sup>[f]</sup>             | 18.20% - 26.70% <sup>[g]</sup> | not available        | 0.306% - 0.449%                |
| Folding-enriched, high GFP                                                               | 0.54%                            | 26.70%                         | 24.6% (20/81 clones) | 0.144%                         |
| Estimated % soluble proteins in folding-enriched library                                 |                                  |                                |                      | 1.029% - 1.172% <sup>[h]</sup> |
| Enrichment of soluble proteins after folding selection <sup>[i]</sup>                    |                                  |                                |                      | 35 to 50-fold                  |

[a] Library populations fell into the GDPDwt-like profile window defined by side scatter vs. GFP fluorescence dot plot of GDPDwt-GFP construct (Figure S5).  
[b] Only the low and high GFP populations were sorted during the FACS experiment.  
[c] % Non-empty cells defined as the ratio (# of cells analyzed - # of cells with empty-vector) / (# of cells analyzed). A total of 1.4% of the control library and 5.4% of the folding-enriched library fell into the GDPDwt-like window used for sorting and analysis.  
[d] % Soluble GFP fusions of sorted cells calculated from Western blot analysis (Figure S6) using Image J to quantitate the intensities of all anti-GFP stained bands. Defined as the ratio (intensity of soluble GFP-fusions) /  $\Sigma$  (intensity of all anti-GFP stained bands).  
[e] % Soluble GFP fusions of all cells calculated as (% non-empty cells x % soluble GFP fusions of sorted cells) for the population of interest.  
[f] % Non-empty cells for the unsorted medium GFP population was calculated as the difference in % non-empty empty cells populations (GDPDwt-like – low GFP – high GFP).  
[g] Values are lower and upper estimates based on % soluble GFP fusions of sorted cells in the low and high GFP populations.  
[h] Estimated % soluble proteins in a library calculated as  $\Sigma$  (% soluble GFP fusions of all cells) for low, medium and high GFP populations.  
[i] Fold improvement defined as the ratio (estimated % soluble proteins in the folding-enriched library)/ (estimated % soluble proteins in the control library).



**Table S3.** List of primers used during library construction.

| Primer                     | Sequence                                                                                       |
|----------------------------|------------------------------------------------------------------------------------------------|
| 041B <sup>[a]</sup>        | GCCTTCTAATACGACTCACTATAGGGACAATTACTATTTACAATTACAATGGGCAGCGATAAGATCCACC                         |
| 042 <sup>[a]</sup>         | TTAATAGCCGGTGCCAGATCCAGACATTCC                                                                 |
| 018                        | TATGACCAAGCTTCCAGGGTGTTCCTCAGATACTTGGCGGAGTAACCSNNSNNGCCCAGCACAAATCAC                          |
| 019                        | CTGGAACACACCTGGAAG                                                                             |
| 047                        | AACAACAAGGTCTCAGGCGCTTTAAATCSNNSNNSNNSNNSNNGCTCACGACCACCTTGCC                                  |
| 048                        | AACAACAAGGTCTCGGCGCTGTTCGGTCTGGACG                                                             |
| 028                        | AACAACAAGGTCTCCCTCACGTTCSNNSNNSNNSNNGATTTTCGATGTTGATGATCTTG                                    |
| 029                        | AACAACAAGGTCTCGTGAGGCCGCGGACGCGAGTGCTGGAGATCAGCAAAAAGCGTAAG                                    |
| 022                        | TGGAGGTCCTTGGTACCCTTGAATTTTCATCCAGCAGGTCCAGATCSNNSNNSNNSNNGGAGCTGAAAATCAGGTTCTTAC              |
| 023                        | GATCTGGACCTGCTGGATG                                                                            |
| 012                        | AGTAGAGGTACCAATACGGTTATNNSATCNSNNSNNSNNSNNSNNTACGGTTCATTGAAAATTTCCG                            |
| 015                        | CTTCGTCGATCAGATAACCG                                                                           |
| 003                        | AGTAAAGAGCTCAAAGGCCTGSNNSNNSNNSNNSNNSNNCACGTGCAGAGAGTACGGAC                                    |
| 017                        | AGGCCCTATCAGGCCTTTGAG                                                                          |
| 013                        | AGTAGATACGTATTTTGC GG TAGATTTCCGGATCSNNSNNSNNSNNSNNCACAAAAATCAGGATGCC                          |
| 016                        | CTGAAAGAGCTGACCGATGG                                                                           |
| 039                        | TTAATAGCCGGTGCCAGATCCAGACATTCCCATTTTGTTCATCGTCATCCTTATAGTCGGAGCCACCGGTCTCACCTTGAATTTTTCATCCAGC |
| 040B                       | TTCTAATACGACTCACTATAGGGACAATTACTATTTACAATTACAATGCACCATCACCATCACCATGGTCTCAAGGGTACCAATACGGTTAT   |
| 035B                       | GACTGAACTGATGCCTATATGCTTGTCCGTCCAGATTGGTCTCGTGTGTTGAGAACGTGTCCGATG                             |
| 036B                       | AACTCAAGTATCGCTATGCCGCTCAATAACCGAGGTCTCAAACACTTCCTTCAGGGTGG                                    |
| 049                        | CTGCGTGGTAGCTCGTAGCACAGACTCAGCGGATACACACAGAGGTCTCAAAAATTCAAGGGTACCAAAATACGG                    |
| 050                        | GCACTCCGCTTAGATAGATAGCCAGAAGACAGACAAGGTCTCATTTTTTCATCCAGCAGGTCCAG                              |
| 037B                       | AAGTAGCATAGAGTGTGCTCTGGATGTCAAGGTCTCAAAGGAGCGTCCGTACTCTCTG                                     |
| 038B                       | ATGATAGCAGATGGACTTAGATTTCCGGTCAGGTGCCGAGGTCTCCCTTTTCCACGCGCTCCAGC                              |
| GDPDx_001 <sup>[b]</sup>   | TCTGTAAACCATGGATGGGCAGCGATAAGATCCAC                                                            |
| GDPDx_002 <sup>[b]</sup>   | CTGTGCGCTCGAGTTAATAGCCGGTGCCAGATCC                                                             |
| GDPDx_003 <sup>[c]</sup>   | GAAGGAGATATACATATGGGCAGCGATAAGATC                                                              |
| GDPDx_004 <sup>[c]</sup>   | GGAGCCAGCGCGCCGCCATAGCCGGTGCCAGATCCAG                                                          |
| GDPDmut_Fw <sup>[d]</sup>  | GAAGCCGGCGCGAATCGTGAGGAGCTGGATGTG                                                              |
| GDPDmut_Rev <sup>[d]</sup> | CACATCCAGCTCCTCACGATTCGCGCCGGCTTC                                                              |
| 030 <sup>[e]</sup>         | TTCTAATACGACTCACTATAGGGACAATTACTATTTACAATTACAATGGGCAGCGATAAGATCGTGATTGTGCTGGGCCATCGCGG         |

[a] Primers used as standard primers to amplify any full length GDPD-based template during the library construction.

[b] Primers used to amplify template DNA for insertion into the pET28a plasmid for protein expression.

[c] Primers used to amplify template DNA for insertion into the pER13 plasmid for the GFP-fusion assay.

[d] Primers used to generate pET28/GDPDmut from the pET28/GDPDwt template.

[e] Primers 030 and 042 were used to generate GDPDmut(-His<sub>6</sub>) from the pET28/GDPDmut template.

| Table S4. Fragments used in library assembly. <sup>[a], [b]</sup> |             |               |      |      |             |               |      |     |                                        |
|-------------------------------------------------------------------|-------------|---------------|------|------|-------------|---------------|------|-----|----------------------------------------|
| Library <sup>[d]</sup>                                            | 5'-Fragment |               |      |      | 3'-Fragment |               |      |     | Restriction enzyme used <sup>[c]</sup> |
|                                                                   | Name        | Template      | FW   | REV  | Name        | Template      | FW   | REV |                                        |
| L1                                                                | L1_A        | pET28/GDPDwt  | 041B | 018  | L1_B        | pET28/GDPDwt  | 019  | 042 | <i>HindIII</i>                         |
| L2                                                                | L2_A        | pET28/GDPDwt  | 041B | 047  | L2_B        | pET28/GDPDwt  | 048  | 042 | <i>BsaI</i>                            |
| L3                                                                | L3_A        | pET28/GDPDwt  | 041B | 028  | L3_B        | pET28/GDPDwt  | 029  | 042 | <i>BsaI</i>                            |
| L3(-His6)                                                         | L3_A(-His6) | pET28/GDPDwt  | 030  | 028  | L3_B        | pET28/GDPDwt  | 029  | 042 | <i>BsaI</i>                            |
| L4                                                                | L4_A        | pET28/GDPDwt  | 041B | 022  | L4_B        | pET28/GDPDwt  | 023  | 042 | <i>KpnI</i>                            |
| L5                                                                | L5_A        | pET28/GDPDwt  | 041B | 015  | L5_B        | pET28/GDPDwt  | 012  | 042 | <i>KpnI</i>                            |
| L6                                                                | L6_A        | pET28/GDPDwt  | 041B | 003  | L6_B        | pET28/GDPDwt  | 017  | 042 | <i>SacI</i>                            |
| L7                                                                | L7_A        | pET28/GDPDwt  | 041B | 013  | L7_B        | pET28/GDPDwt  | 016  | 042 | <i>SnaBI</i>                           |
| L1-2 <sup>[e]</sup>                                               | L1-2_A      | L1            | 041B | 047  | L2_B        | pET28/GDPDwt  | 048  | 042 | <i>BsaI</i>                            |
| L3-4 <sup>[e]</sup>                                               | L3-4_A      | pET28/GDPDwt  | 041B | 028  | L3-4_B      | L4            | 029  | 042 | <i>BsaI</i>                            |
| L6-7 <sup>[e]</sup>                                               | L6-7_A      | L6            | 041B | 034  | L6-7_B      | L7            | 033  | 042 | <i>BsaI</i>                            |
| L1-4 <sup>[f]</sup>                                               | C-L1-4_A    | L1-2          | 041B | 036B | C-L1-4_B    | L3-4          | 035B | 042 | <i>BsaI</i>                            |
| L5-7 <sup>[g]</sup>                                               | C-L5-7_A    | L5            | 041B | 038B | C-L5-7_B    | L6-7          | 037B | 042 | <i>BsaI</i>                            |
| L1-4 (m)                                                          | F-L1-4_A    | L1-2 (m)      | 041B | 036B | F-L1-4_B    | L3-4 (m)      | 035B | 042 | <i>BsaI</i>                            |
| L5-7 (m)                                                          | F-L5-7_A    | L5 (m)        | 041B | 038B | F-L5-7_B    | L6-7 (m)      | 037B | 042 | <i>BsaI</i>                            |
| Control library                                                   | C-frag_A    | L1-4 frag (m) | 041B | 050  | C-frag_B    | L5-7 frag (m) | 049  | 042 | <i>BsaI</i>                            |
| Folding-enriched library                                          | F-frag_A    | L1-4 (m&p)    | 041B | 050  | F-frag_B    | L5-7 (m&p)    | 049  | 042 | <i>BsaI</i>                            |

[a] Individual libraries were generated by amplifying the 5'- and 3'-fragments of the library using the specified template, and FW /REV primer pair.

[b] Libraries denoted with (m) have been subjected to mRNA display; libraries denoted with (p) have been subjected to *in vitro* folding selection by protease digestion.

[c] 5'- and 3'-fragments were digested with the indicated restriction enzyme (RE), gel-purified and ligated to produce the individual libraries. The *BsaI* restriction site, which is absent in the parent GDPDwt scaffold, was introduced into the 5'- and 3' fragments by PCR amplification and was removed again during the gel purification of digested fragments.

[d] Individual libraries were gel purified after the ligation reaction. A fraction of the purified library was used as a template for the successive steps in library assembly.

[e] Libraries were subjected to mRNA display during folding-enriched library construction and then PCR amplified with 041B/042 primer pair to restore T7 promoter sequence lost during the transcription process.

[f] Library was used as template with 041B/039 primer pair to generate the control library fragment (L1-4 frag) subjected to mRNA display.

[g] Library was used as template with 040B/042 primer pair to generate the control library fragment (L5-7 frag) subjected to mRNA display.

## Supplementary Data

### DNA sequence of the GDPDwt scaffold used as template for library assembly

```
GCCTTCTAATACGACTCACTATAGGGACAATTACTATTTACAATTACAATGGGCAGCGAT
AAGATCCACCATCACCATCACCATGTGATTGTGCTGGGCCATCGCGGTTACTCCGCCAAG
TATCTGGAAAACACCCTGGAAGCTTTCATGAAAGCGATCGAAGCCGGCGCGAATGGTGTG
GAGCTGGATGTGCGCCTGTCTAAAGACGGCAAGGTGGTCGTGAGCCATGATGAAGATTTA
AAGCGCCTGTTTCGGTCTGGACGTCAAATCCGTGACGCCACCGTGTCTGAACTGAAAGAG
CTGACCGATGGCAAATTAACCACCCTGAAGGAAGTGTGTTGAGAACGTGTCCGATGACAAG
ATCATCAACATCGAAATCAAGGAACGTGAGGCCGCGGACGCAGTGCTGGAGATCAGCAA
AAGCGTAAGAACCTGATTTTCAGCTCCTTTGATCTGGACCTGCTGGATGAAAAATTCAAG
GGTACCAAATACGGTTATCTGATCGACGAAGAGAAGTACGGTTCCATTGAAAAATTTTCGTG
GAGCGCGTGGAAAAGGAGCGTCCGTACTCTCTGCACGTGCCCTATCAGGCCTTTGAGCTC
GAATATGCGGTGGAGGTGCTGCGCTCCTTCCGTAAAAGGGGCATCGTGATTTTTGTGTGG
ACCCTGAATGATCCGGAAATCTACCGCAAATACGTAGAGAGATCGATGGTGTGATTACC
GACGAAGTGGAGCTGTTTGTGAAACTGCGTGGCGGCAGCGGTGGCTCCGACTATAAGGAT
GACGATGACAAAATGGGAATGTCTGGATCTGGCACC GGCTAT TAA
```

Color code:

T7 transcription promoter / TMV translation enhancer

Thio6/His<sub>6</sub>

GDPDwt

(GGG)<sub>2</sub> spacer

FLAG tag

Puromycin-crosslinking region

Primers 041B and 042 were used as standard primers to amplify any full length GDPD-based template during the library construction. Primers GDPDx\_001 and GDPDx\_002 were used to amplify template DNA for insertion into the pET28a plasmid for protein expression. Primers GDPDx\_003 and GDPDx\_004 were used to amplify template DNA for insertion into the pER13 plasmid for the GFP-fusion assay. Primers GDPDmut\_Fw and GDPDmut\_Rev were used to generate pET28/GDPDmut from the pET28/GDPDwt template. Primers 030 and 042 were used to generate GDPDmut(-His<sub>6</sub>) from the pET28/GDPDmut template.

**Sequence alignment of the six soluble F(s) clones characterized in this manuscript (Figure 4).**

Alignment was performed using Clustal Omega server, Clustal O(1.1.0)

Loop residues randomized during library construction are highlighted in green.

\* = column contains identical amino acid

: = column contains different but highly conserved amino acids

```
GDPDwt      MGSDKIHHHHHHVIVLGRGYSAKYLENTLEAFMKAIEAGANGVELDVRLSKDGKVVVSHDEDLKRLFG
F (s) 1     MGSDKIHHHHHHVIVLGRGYSAKYLENTLEAFMKAIEAGANGVELDVRLSKDGKVVVSHDEDLKRLFG
F (s) 2     MGSDKIHHHHHHVIVLGRGYSAKYLENTLEAFMKAIEAGANGVELDVRLSKDGKVVVSHDEDLKRLFG
F (s) 3     MGSDKIHHHHHHVIVLGRGYSAKYLENTLEAFMKAIEAGANGVELDVRLSKDGKVVVSHDEDLKRLFG
F (s) 4     MGSDKIHHHHHHVIVLGRGYSAKYLENTLEAFMKAIEAGANGVELDVRLSKDGKVVVSHDEDLKRLFG
F (s) 5     MGSDKIHHHHHHVIVLGRGYSAKYLENTLEAFMKAIEAGANGVELDVRLSKDGKVVVSHDEDLKRLFG
F (s) 6     MGSDKIHHHHHHVIVLGRGYSAKYLENTLEAFMKAIEAGANGVELDVRLSKDGKVVVSHDEDLKRLFG
*****      *****      *****      *****      *****      *****      *****
```

```
GDPDwt      LDVKIRDATVSELKELTDGKITTLKEVFENVSDDKIINIEIKEREAAAVLEISKRRKNLIFSSFDLDDL
F (s) 1     LDVKIRDATVSELKELTDGKITTLKEVFENVSDDKIINIEIKEREAAAVLEISKRRKNLIFSSFDLDDL
F (s) 2     LDVKIRDATVSELKELTDGKITTLKEVFENVSDDKIINIEIKEREAAAVLEISKRRKNLIFSSFDLDDL
F (s) 3     LDVKIRDATVSELKELTDGKITTLKEVFENVSDDKIINIEIKEREAAAVLEISKRRKNLIFSSFDLDDL
F (s) 4     LDVKIRDATVSELKELTDGKITTLKEVFENVSDDKIINIEIKEREAAAVLEISKRRKNLIFSSFDLDDL
F (s) 5     LDVKIRDATVSELKELTDGKITTLKEVFENVSDDKIINIEIKEREAAAVLEISKRRKNLIFSSFDLDDL
F (s) 6     LDVKIRDATVSELKELTDGKITTLKEVFENVSDDKIINIEIKEREAAAVLEISKRRKNLIFSSFDLDDL
*****      *****      *****      *****      *****      *****      *****
```

```
GDPDwt      LDEKFKGTYGYLIDE-ENYGS IENFVERVEKERPYSLHVP---YQAFELEYAVEVLRSLRKKGIVIF
F (s) 1     LDEKFKGTYGYLIDE-ENYGS IENFVERVEKERPYSLHVTPTLLSQAFELEYAVEVLRSLRKKGIVIF
F (s) 2     LDEKFKGTYGYKISLWASYGS IENFVERVEKERPYSLHVSSTKDAQAFELEYAVEVLRSLRKKGIVIF
F (s) 3     LDEKFKGTYGYKISLWASYGS IENFVERVEKERPYSLHVSSTKDAQAFELEYAVEVLRSLRKKGIVIF
F (s) 4     LDEKFKGTYGYIISLKDTYGS IENFVERVEKERPYSLHVQRASFQAFELEYAVEVLRSLRKKGIVIF
F (s) 5     LDEKFKGTYGYIAEGLVYGS IENFVERVEKERPYSLHVELEFMIQAFELEYAVEVLRSLRKKGIVIF
F (s) 6     LDEKFKGTYGYLIDE-ENYGS IENFVERVEKERPYSLHVAVGRVLQAFELEYAVEVLRSLRKKGIVIF
*****      *          *****      *****      *****      *****      *****
```

```
GDPDwt      VWT-LN DPEIYRKIRREIDGVITDEVELFVKLRGGSGGSYKDDDDKMGMSGSGTGY
F (s) 1     VKNNVCDPEIYRKIRREIDGVITDEVELFVKLRGGSGGSYKDDDDKMGMSGSGTGY
F (s) 2     VPCLRCDPEIYRKIRREIDGVITDEVELFVKLRGGSGGSYKDDDDKMGMSGSGTGY
F (s) 3     VASSTHDPEIYRKIRREIDGVITDEVELFVKLRGGSGGSYKDDDDKMGMSGSGTGY
F (s) 4     VAPDLPDPEIYRKIRREIDGVITDEVELFVKLRGGSGGSYKDDDDKMGMSGSGTGY
F (s) 5     VRADMSDPEIYRKIRREIDGVITDEVELFVKLRGGSGGSYKDDDDKMGMSGSGTGY
F (s) 6     VTSVTRDPEIYRKIRREIDGVITDEVELFVKLRGGSGGSYKDDDDKMGMSGSGTGY
*          *****      *****      *****      *****      *****      *****
```
